# Supplementary material
Source: PubMed Central journal article supplement (PMC6525033)

**(a)**

♀ NB

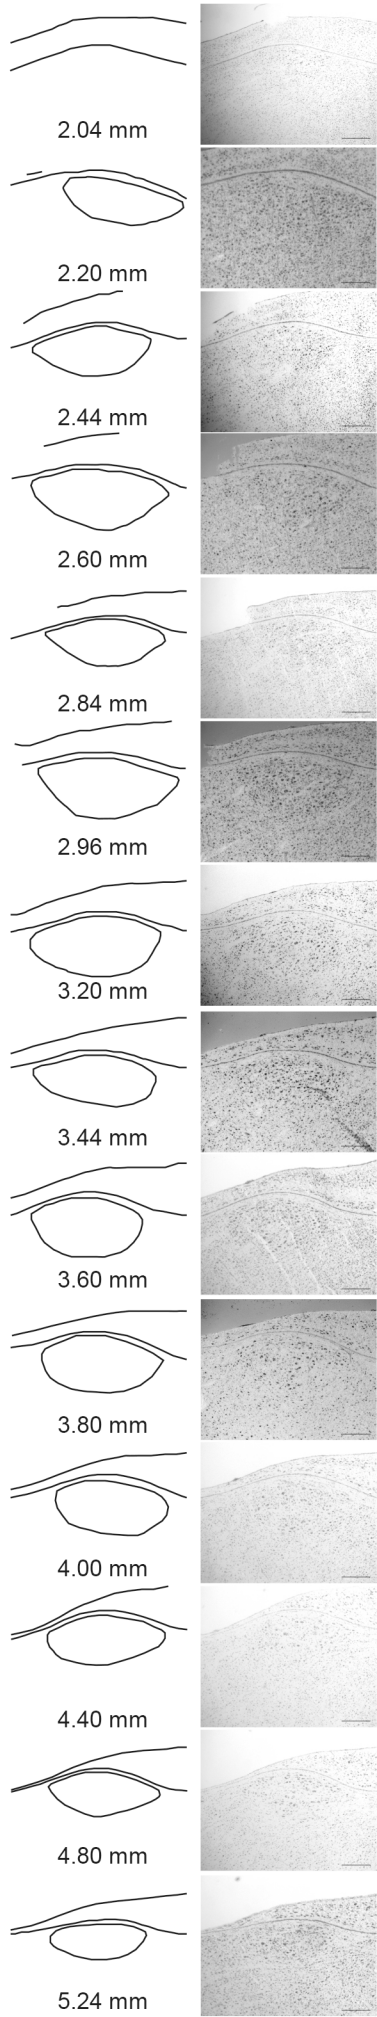**(b)**

♂ NB

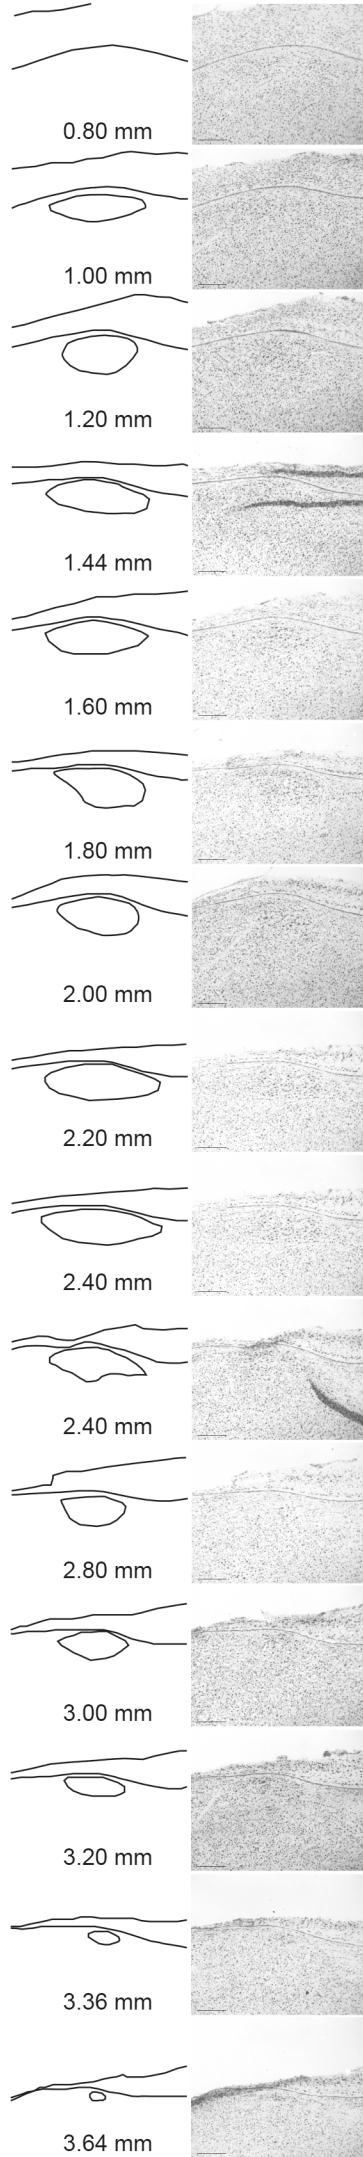**(c)**

♂ B

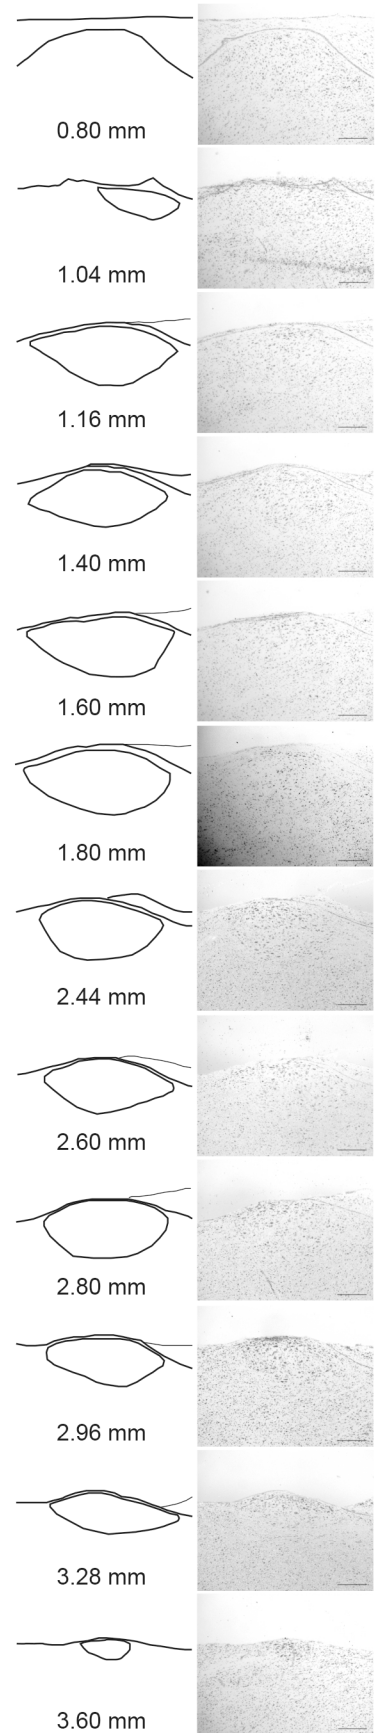

Supplement: NIHMS1020838-supplement-Supp_figS1.pdf [file NIHMS1020838-supplement-Supp_figS1.pdf]
